# Supplementary material for: Supporting Cell-Based Tendon Therapy: Effect of PDGF-BB and Ascorbic Acid on Rabbit Achilles Tenocytes In Vitro
Source: Int J Mol Sci. 2020 Jan 10;21(2):458. doi: 10.3390/ijms21020458 (PMC7014238; doi:10.3390/ijms21020458)
Supplement: Supplementary file 1 [file ijms-21-00458-s001.pdf]

## Supporting Information

**Table S1.** Gene abbreviations, NCBI reference sequences of mRNAs (used as template for primer design), amplicon size and primer sequences used for Real-Time PCR Analysis.

| Gene            | mRNA ID (NCBI Reference Sequence) | Amplicon Size (bp) | Forward Primer Sequence (3'→ 5') | Reverse Primer Sequence (5'→ 3') |
|-----------------|-----------------------------------|--------------------|----------------------------------|----------------------------------|
| <i>18S rRNA</i> | NR_033238.1                       | 176                | GGAAGTGAAGGCCAT<br>GATTAAG       | CGGAAGTACGACGGT<br>ATCTG         |
| <i>COL1A1</i>   | XM_008271783.1                    | 271                | CTGGTGAATCTGGAC<br>GTGAG         | TGTCTCACCCTTGTCA<br>CCAC         |
| <i>COL1A2</i>   | NM_001195668.1                    | 170                | CCAATCACGCCTCTC<br>AGAAC         | GCAGCCATCGACAAG<br>AACAG         |
| <i>COL3A1</i>   | XM_002712333.2                    | 259                | GCATTGCTTACATGG<br>ATCAGG        | CCAACGTCCGCACCA<br>AATTC         |
| <i>FN</i>       | AF135404.1                        | 270                | GCAACCCACAGTGG<br>AATACG         | AGTCCTGACACAACA<br>ACAGAC        |
| <i>αSMA</i>     | NM_001101682.2                    | 224                | CGTGACTACTGCTGA<br>ACGTG         | GGATGCCAGCAGATT<br>CCATC         |
| <i>TNC</i>      | FJ480400.1                        | 219                | GTCATCATCACAGC<br>TCTGG          | CTGAGTGTGTATTCCG<br>TGGC         |
| <i>TNMD</i>     | NM_001109818.1                    | 239                | GCAGTTTCCGAGTTA<br>CAAGAC        | CGACGGCAGTAAATA<br>CAACAG        |
| <i>DCN</i>      | NM_001082330.1                    | 255                | GTGGACAATGGTTCT<br>CTGGC         | AAGGTGGATGGCTGG<br>ATCTC         |
| <i>ACAN</i>     | L38480.1                          | 113                | GCTACGGAGACAAG<br>GATGAG         | GTAAAAGACCTCACC<br>CTCCAT        |
| <i>BGN</i>      | NM_001195691.1                    | 199                | GGCCTGAAGCTCAAC<br>TACCT         | GGCTCCCGTTCTCAAT<br>CATC         |
| <i>MKI67</i>    | XM_008251084.2                    | 283                | CACATCCAGCAGTGA<br>AACGG         | GTGTTAGCAGTACCT<br>GAAGTC        |
| <i>MMP2</i>     | D63579.1                          | 220                | GAAGATCGACGCTGT<br>GTACG         | GTATCTCCAGAACTT<br>GTCTCC        |
| <i>MMP9</i>     | D26514.1                          | 160                | GATACAGCCTGTTCC<br>TCGTG         | GGACCATATAGATGC<br>TGGATG        |
| <i>TIMP1</i>    | NM_001082232.2                    | 236                | CTACCTTGTAACAGC<br>GTTATG        | GAAGCTCAGACTGTT<br>CCAGG         |
| <i>TIMP2</i>    | XM_008252510.2                    | 224                | CTGTCTGGAGGAAGC<br>ACTTG         | CTGCTCAGCGTGGAT<br>ACAAG         |

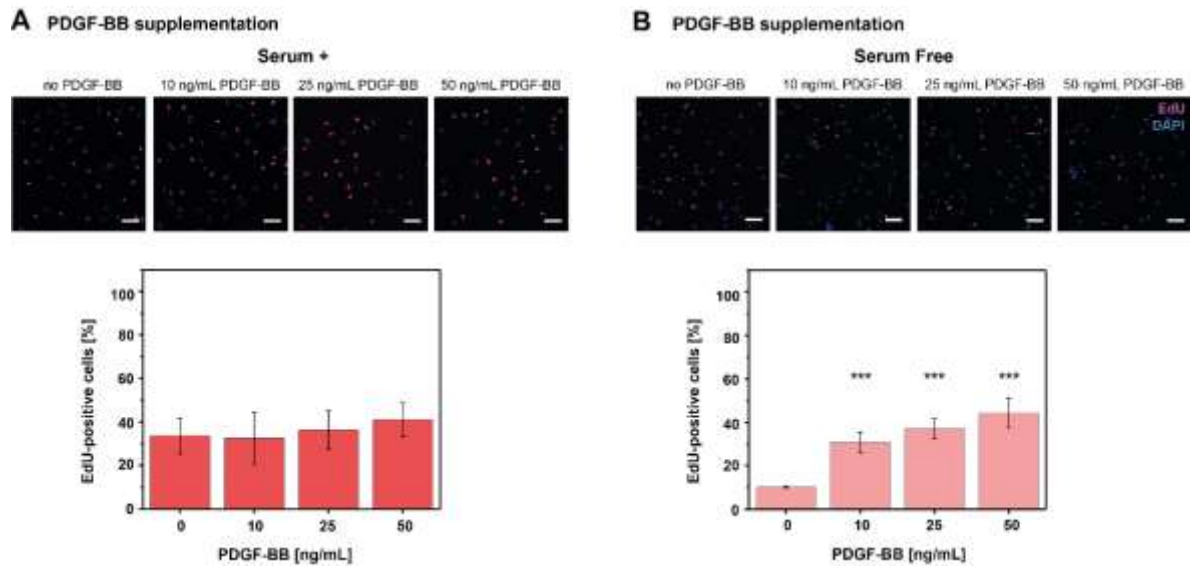

**Figure S1. Effect of PDGF-BB supplementation on tenocyte proliferation.** Representative CLSM images from the EdU proliferation assay and EdU-positive cells [%] for each PDGF-BB concentration (ng/mL) tested in A) serum+ conditions and B) serum-free conditions. Data was adapted from [47]. The total EdU-positive cells [%] was calculated as EdU positive cells (pink) in relation to the total cell number (DAPI stained, blue). Scale bars: 100  $\mu$ m. (Data shown as mean  $\pm$  standard deviation, \*\*  $p < 0.01$ , \*\*\* $p < 0.001$ , obtained by one-way ANOVA).

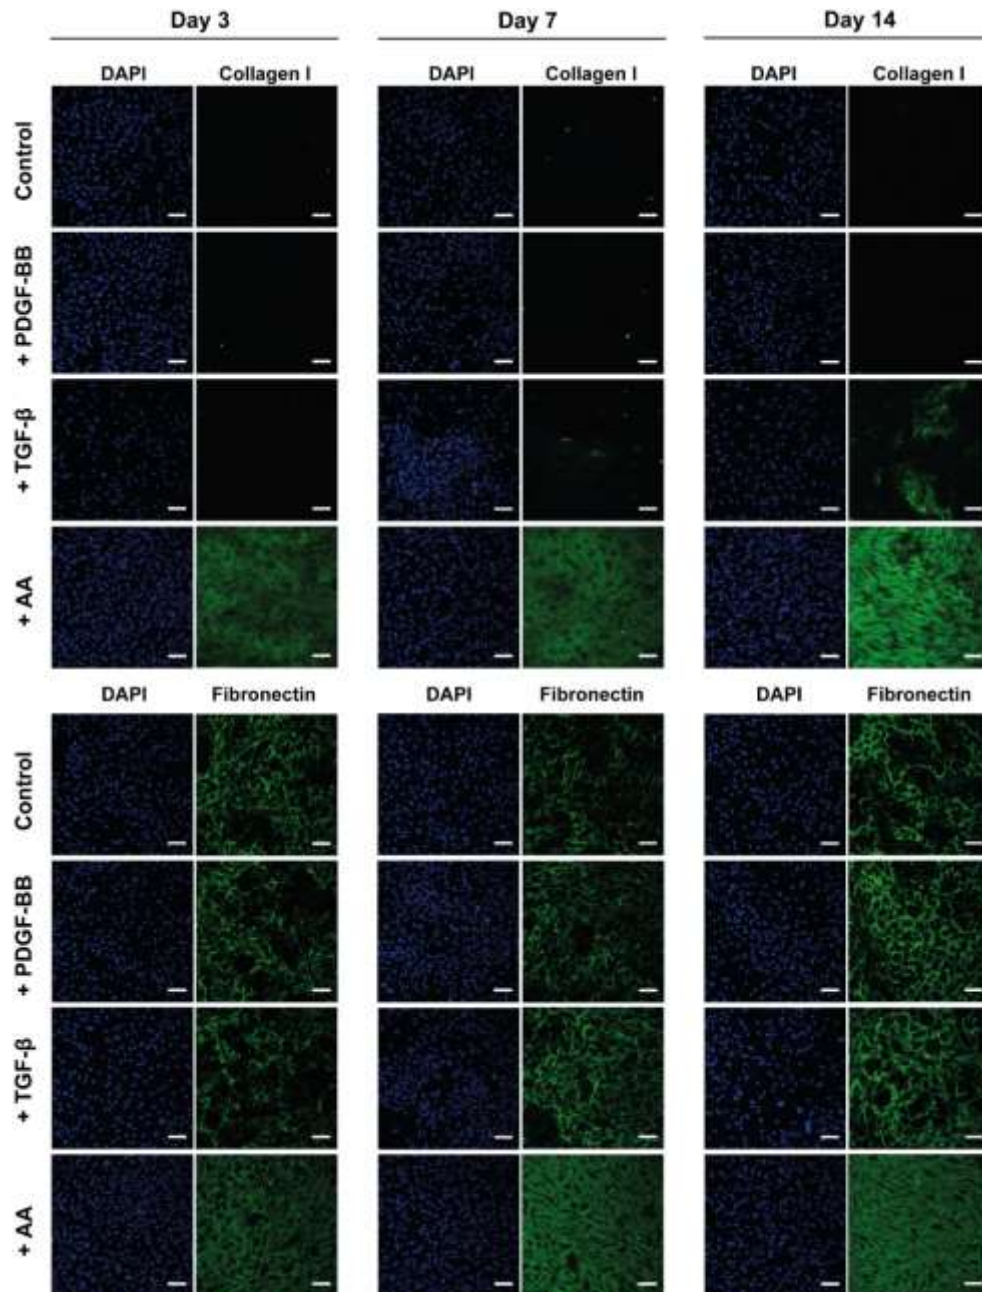

**Figure S2.** Collagen I and fibronectin staining (green) and cell nuclei DAPI staining (blue) of rabbit tenocytes (Animal 2) cultured in vitro in 2D, treated with PDGF-BB, TGF-β, AA or untreated (control) at day 3, 7 and 14. Scale bars: 100 μm. .

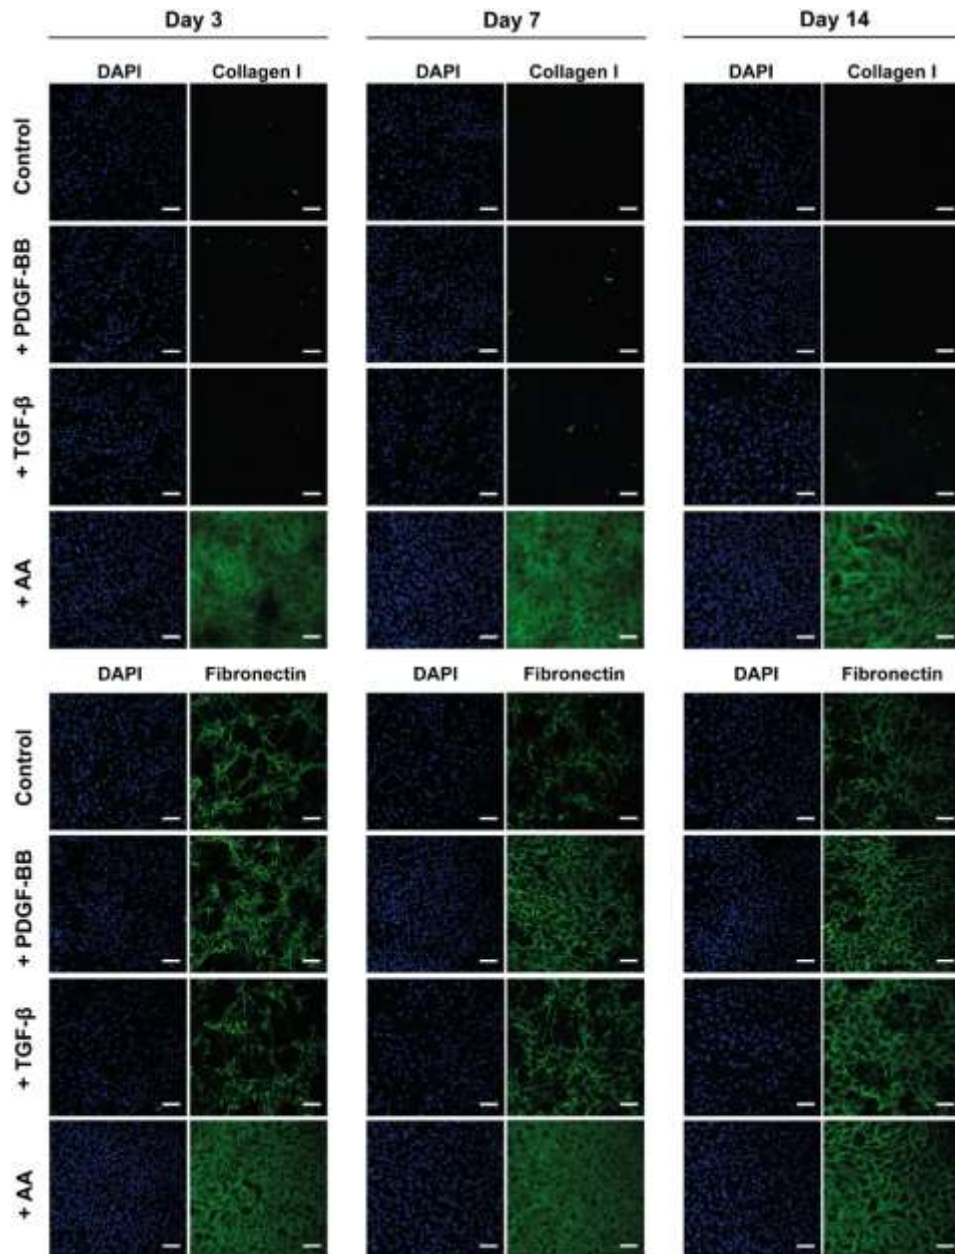

**Figure S3.** Collagen I and fibronectin staining (green) and cell nuclei DAPI staining (blue) of rabbit tenocytes (Animal 3) cultured in vitro in 2D, treated with PDGF-BB, TGF- $\beta$ , AA or untreated control at day 3, 7 and 14. Scale bars: 100  $\mu$ m.

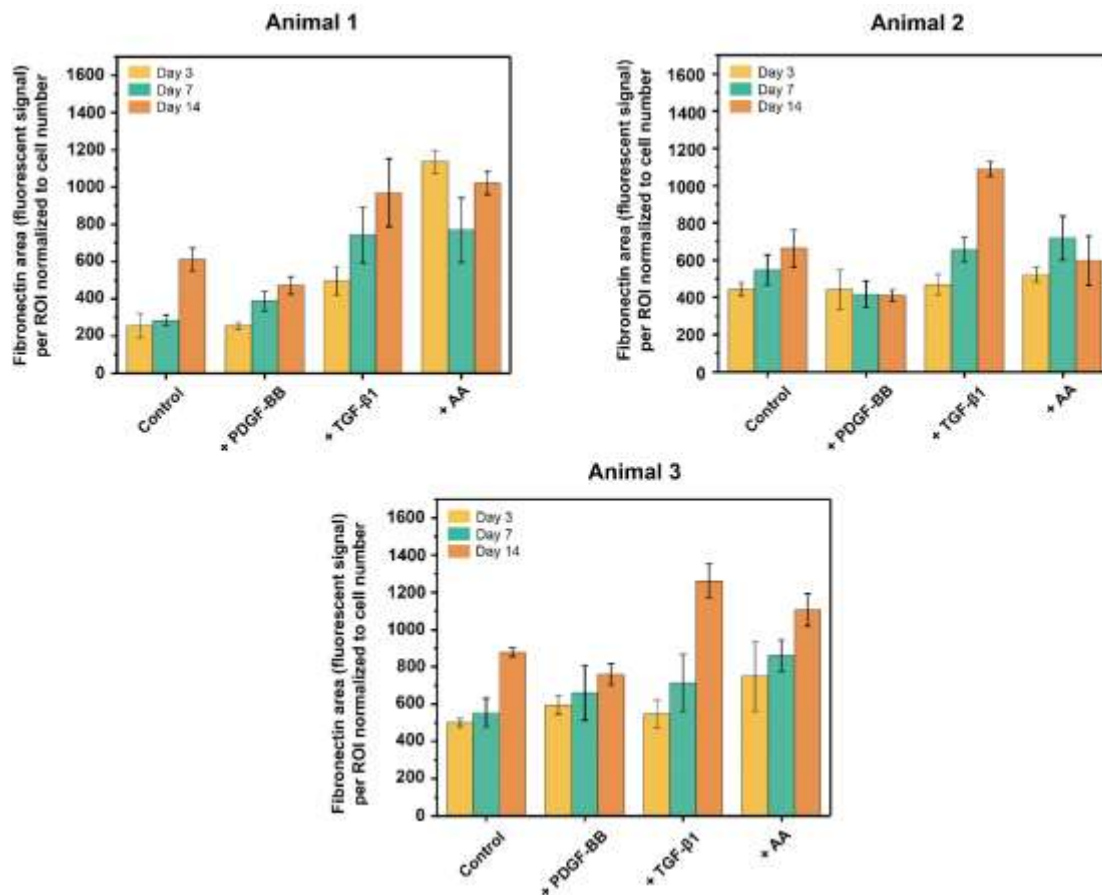

**Figure S4. Quantification of fibronectin deposition by tenocytes in the different treatment conditions.** The signal of fibronectin staining was assessed from images of maximum projections of the z-stacks obtained with confocal microscopy. Briefly, thresholded images were segmented and the total area of the signal in each image was assessed. The area measured was normalized to the cell number relative values for the ratio obtained are shown on the y-axis) in each image and thus the fibronectin deposition was quantified independent of cell density, as the treatments used do increase cell proliferation.
